# Supplementary material for: The adsorption of helium atoms on small cationic gold clusters
Source: Royal Society of Chemistry journal article supplement (doi:10.1039/c8cp01273c), 2018-01-01

**Electronic Supplementary Information**

**The adsorption of helium atoms on small cationic gold clusters**

Marcelo Goulart,<sup>1</sup> Michael Gatchell,<sup>1,2</sup> Lorenz Kranabetter,<sup>1</sup> Martin Kuhn,<sup>1</sup> Paul Martini,<sup>1</sup>  
Norbert Gitzl,<sup>1</sup> Manuel Rainer,<sup>1</sup> Johannes Postler,<sup>1</sup> Paul Scheier<sup>1,\*</sup> and Andrew M. Ellis<sup>3,\*</sup>

<sup>1</sup> Institut für Ionenphysik und Angewandte Physik, Universität Innsbruck, Technikerstr. 25,  
A-6020 Innsbruck, Austria

<sup>2</sup> Department of Physics, Stockholm University, 106 91 Stockholm, Sweden

<sup>3</sup> Department of Chemistry, University of Leicester, University Road, Leicester, LE1 7RH,  
UK

Email: [paul.scheier@uibk.ac.at](mailto:paul.scheier@uibk.ac.at); [andrew.ellis@le.ac.uk](mailto:andrew.ellis@le.ac.uk)

## Experimental data

A complete set of the ion abundance plots determined from mass spectrometry of gold-doped helium droplets is provided below.

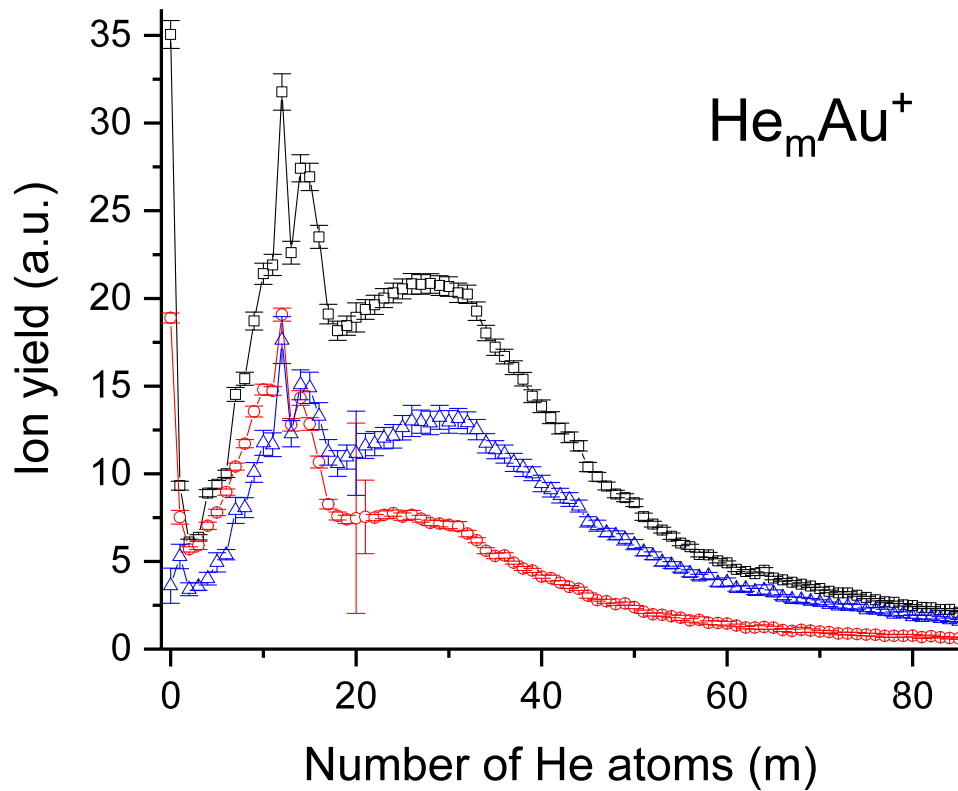

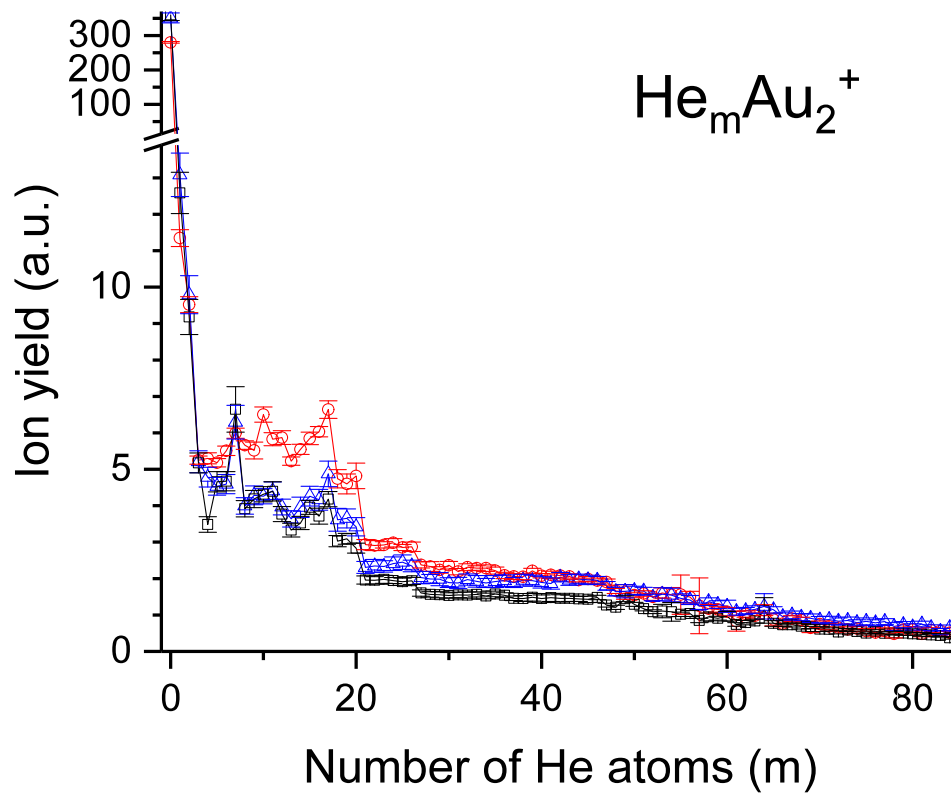

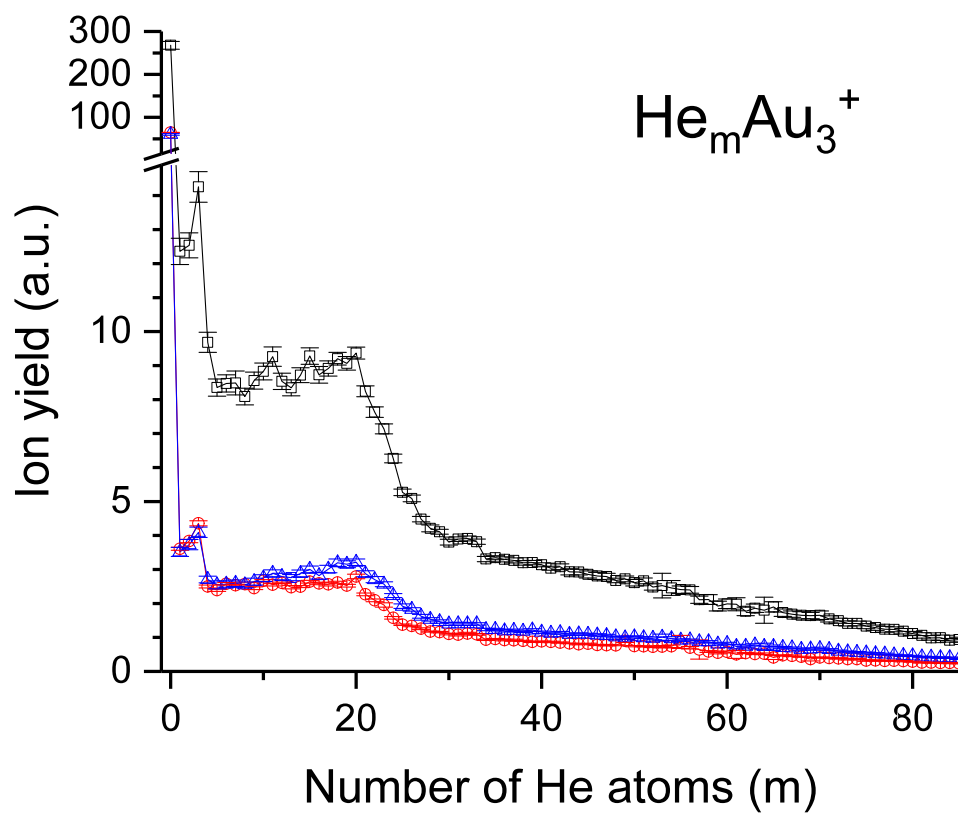

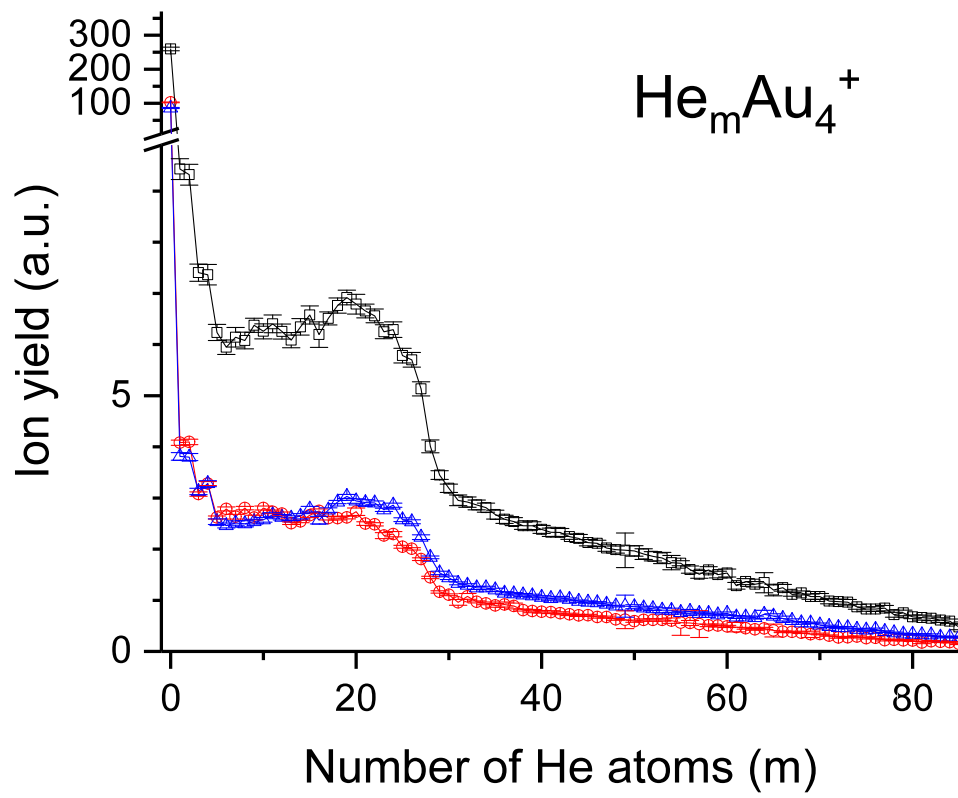

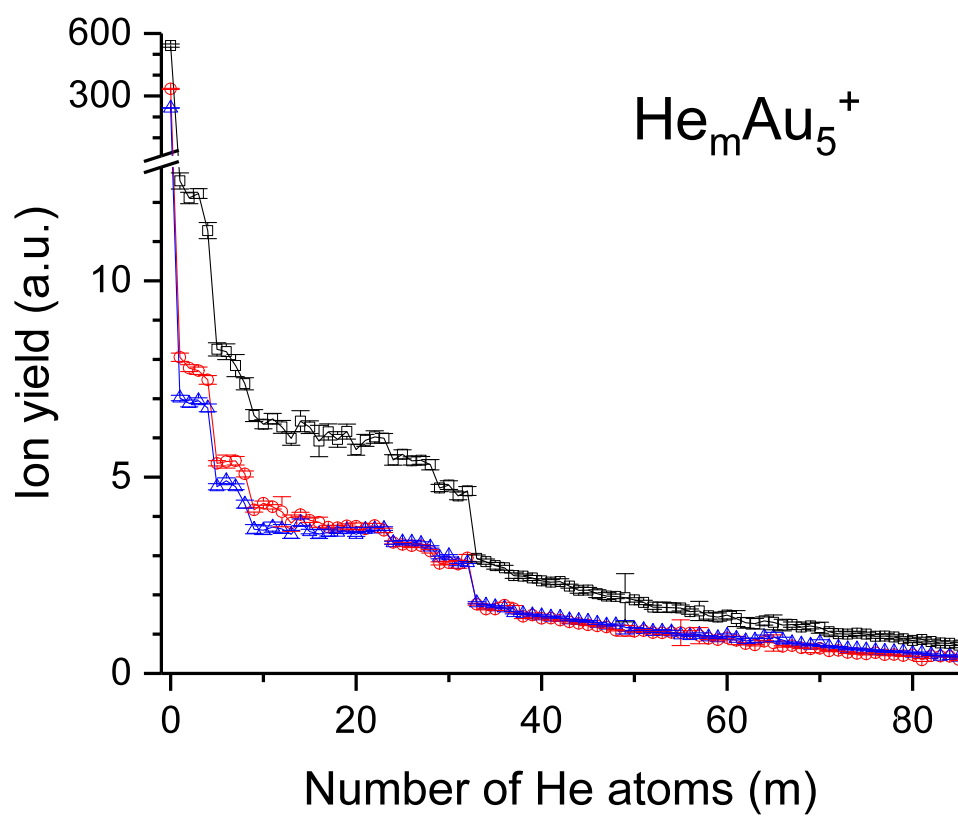

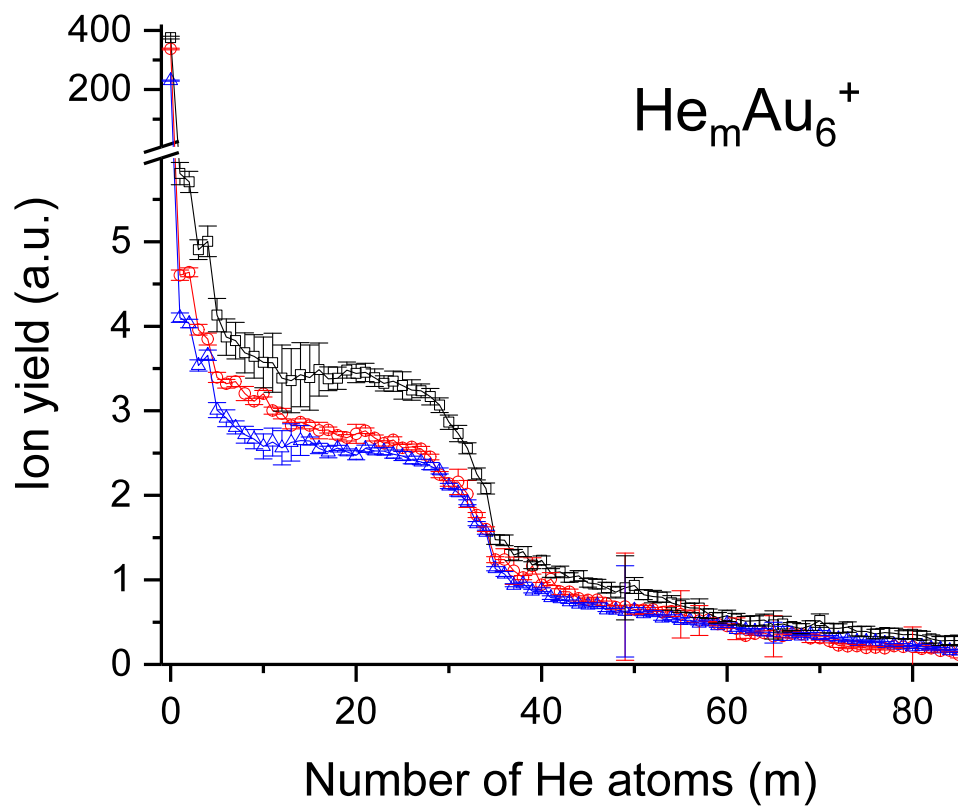

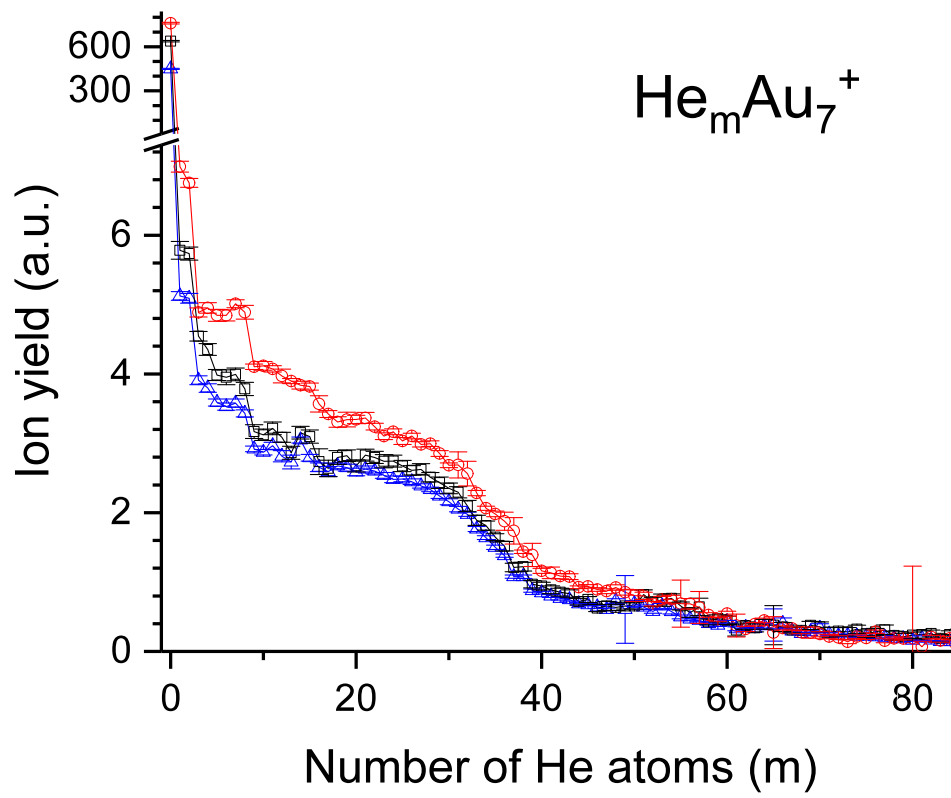



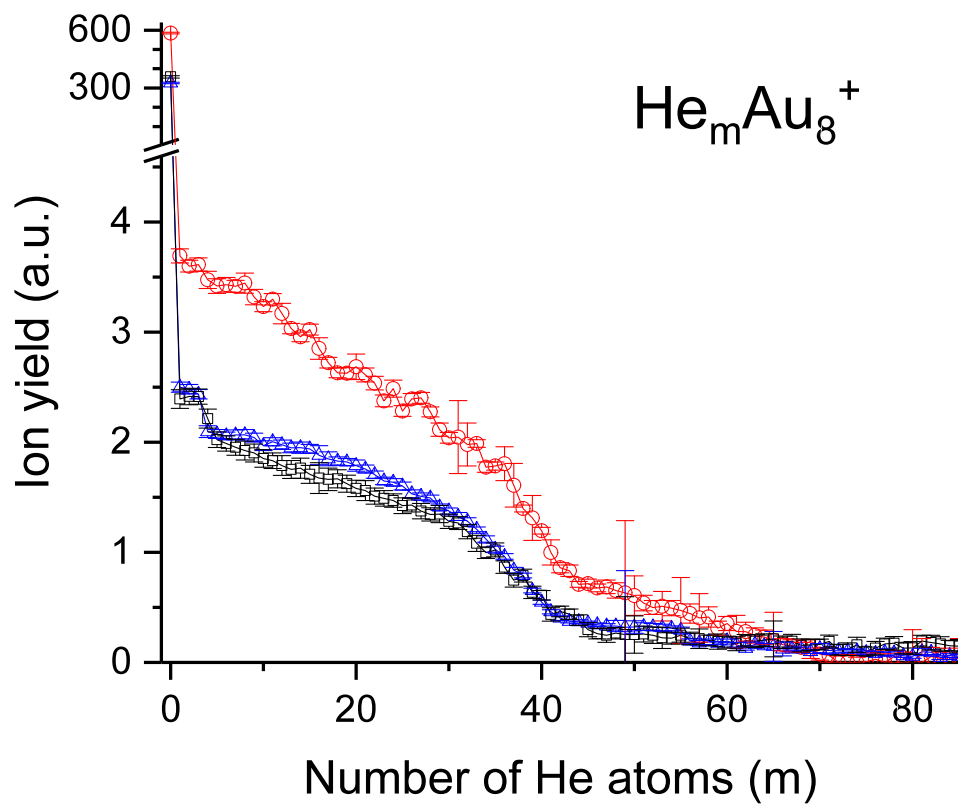

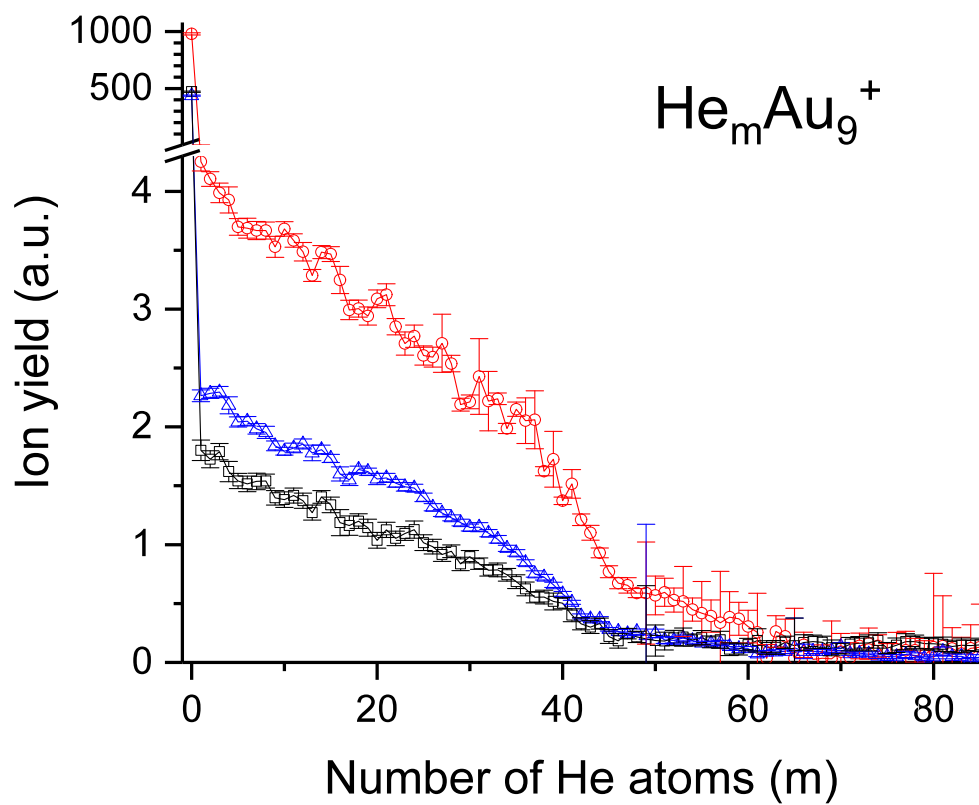

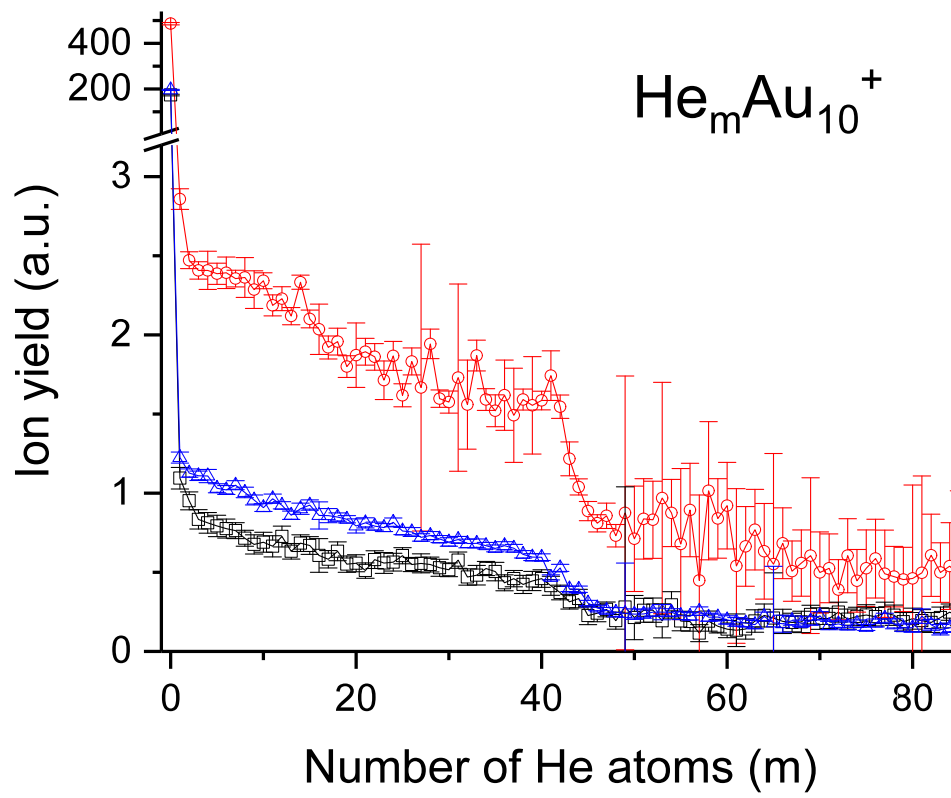

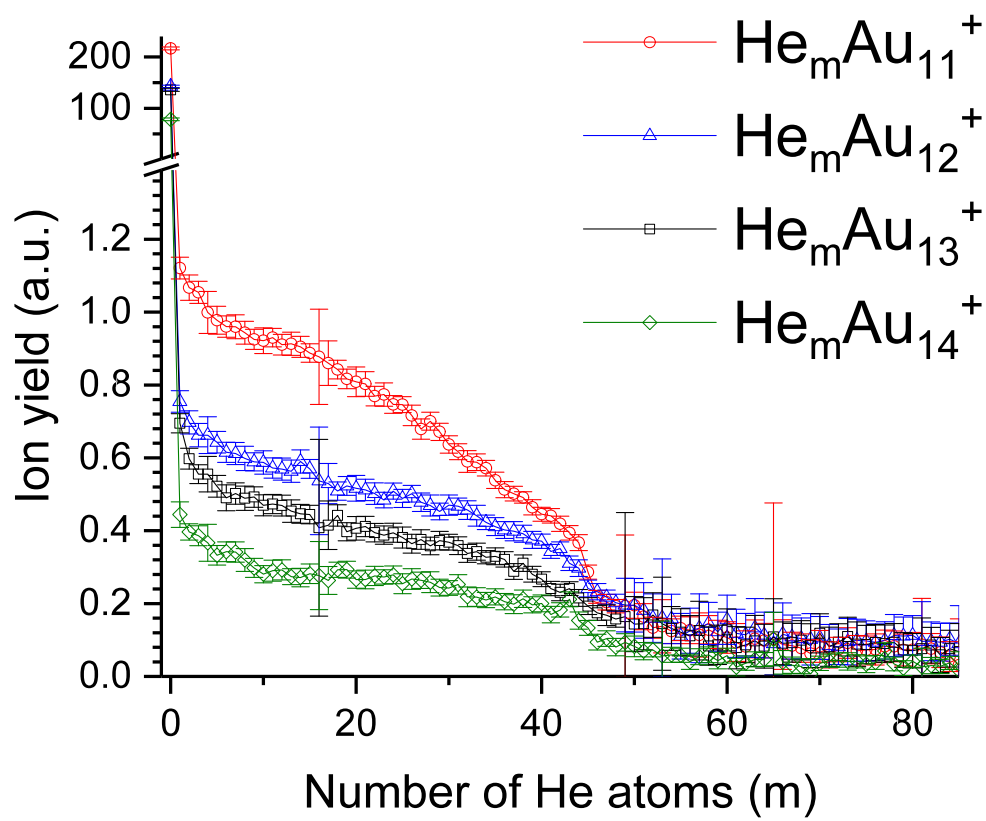

Calculated (MP2) helium binding sites and binding energies for  $Au_n^+$  ions up to and including  $n = 6$

$Au_2^+He_2$

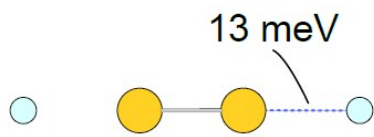

$Au_3^+He_3$

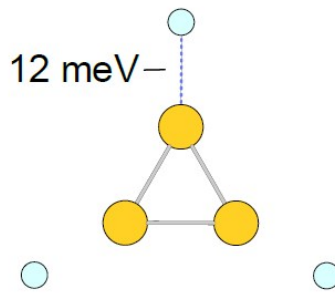

$Au_5^+He_4$

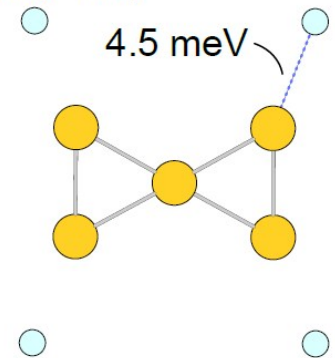

(a)  $Au_4^+He_4$

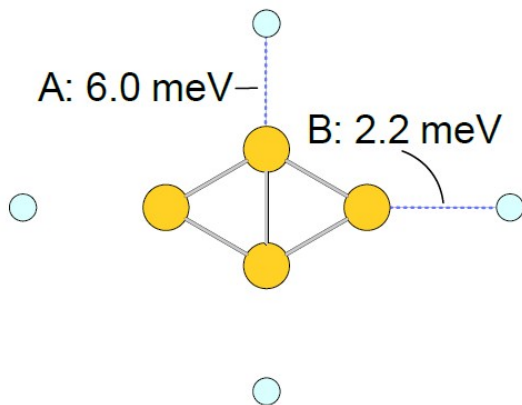

(b)  $Au_6^+He_6$

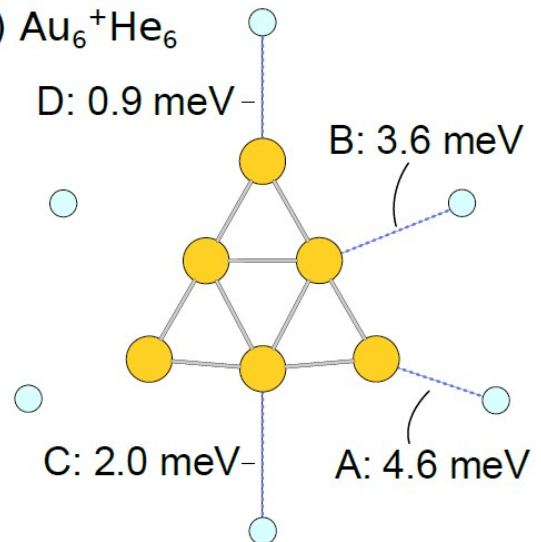

Supplement: c8cp01273c1.pdf [file c8cp01273c1.pdf]
